# Supplementary material for: MRI features can predict EGFR expression in lower grade gliomas: A voxel-based radiomic analysis
Source: Springer Nature journal article supplement (doi:10.1007/s00330-017-4964-z), 2017-07-28
Supplement: MOESM1 [file 13335804]

**Supplementary Table 1:** The four groups of texture features

| Groups | Subgroups | Radiological features |
| --- | --- | --- |
| Group 1. First order statistics |  | 1. Energy; 2. Entropy; 3. Kurtosis; 4. Maximum; 5. Mean; 6. Mean Absolute Deviation; 7. Median; 8. Minimum; 9. Range; 10. Root Mean Square; 11. Skewness; 12. Standard Deviation; 13. Uniformity; 14. Variance |
| Group 2. Shape and size-based features |  | 1. Compactness 1; 2. Compactness 2; 3. Maximum 3D Diameter; 4. Spherical Disproportion; 5. Sphericity; 6. Surface Area; 7. Surface to Volume Ratio; 8. Volume |
| Group 3. Textural features | Grey level co-occurrence matrix | 1. Autocorrelation; 2. Cluster prominence; 3. Cluster Shade; 4. Cluster Tendency; 5. Contrast; 6. Correlation; 7. Difference Entropy; 8. Dissimilarity; 9. Energy; 10. Entropy; 11. Homogeneity 1; 12. Homogeneity 2; 13. Informational Measure of Correlation 1; 14. Informational Measure of Correlation 2; 15. Inverse Difference Moment Normalized; 16. Inverse Difference Normalized; 17. Inverse Variance; 18. Maximum Probability; 19. Sum Average; 20. Sum Entropy; 21. Sum Variance; 22. Variance |
|  | Grey level run-length matrix | 1. Short Run Emphasis; 2. Long Run Emphasis; 3. Grey Level Non-Uniformity; 4. Run Length Non-Uniformity; 5. Run Percentage; 6. Low Grey Level Run Emphasis; 7. High Grey Level Run Emphasis; 8. Short Run Low Grey Level Emphasis; 9. Short Run High Grey Level Emphasis; 10. Long Run Low Grey Level Emphasis; 11. Long Run High Grey Level Emphasis |
| Group 4. Wavelet features  (Group 1 × 8 + Group 3 × 8 = 376 features) |  | 1. Energy_1; 2. Energy_2; 3. Energy_3; 4. Energy_4; 5. Energy_5; 6. Energy_6; 7. Energy_7; 8. Energy_8; …; 369. Long Run High Grey Level Emphasis _1; 370. Long Run High Grey Level Emphasis _2; 371. Long Run High Grey Level Emphasis _3; 372. Long Run High Grey Level Emphasis _4; 373. Long Run High Grey Level Emphasis _5; 374. Long Run High Grey Level Emphasis _6; 375. Long Run High Grey Level Emphasis _7; 376. Long Run High Grey Level Emphasis _8 |
